# Supplementary material for: Engineering Escherichia coli for Efficient Aerobic Conversion of Glucose to Malic Acid through the Modified Oxidative TCA Cycle
Source: MDPI journal article supplement (doi:10.3390/fermentation8120738), 2022-12-14
Supplement: s1 [file s1]

**Table S1.** Primers used in the study.

| <b>Primer</b> | <b>Sequence 5'→3'</b>                                                       |
|---------------|-----------------------------------------------------------------------------|
| P1            | 5'-gatgaaagtcgagtcctcggcgctgctggcggtat-cgctcaagttagtataaaaaagctgaac-3'      |
| P2            | 5'-ttacttattaacgaactcttcgccaggcgatc-tgaagcctgctttttataactaagttgg-3'         |
| P3            | 5'-cttgcgtgactacacattcttg-3'                                                |
| P4            | 5'-ggcaaccaattaagtcgtgc-3'                                                  |
| P5            | 5'-gatggatattcaaaaaagagtgagtgacatggaacc-cgctcaagttagtataaaaaagctgaac-3'     |
| P6            | 5'-ttagatggaggtagcgcggtattcggc-tgaagcctgctttttataactaagttgg-3'              |
| P7            | 5'-cgctgaaaagtaattcataaccatc-3'                                             |
| P8            | 5'-gttctgcatagcaggtgaggc-3'                                                 |
| P9            | 5'-aatggatgaccagttaaaacaagtcacttgattt-cgctcaagttagtataaaaaagctgaac-3'       |
| P10           | 5'-ttacagcgggtgggttgcgcttctaccacggccag-tgaagcctgctttttataactaagttgg-3'      |
| P11           | 5'-gacaggcatggtattgctgg-3'                                                  |
| P12           | 5'-gagagatattcgtgtgtgc-3'                                                   |
| P13           | 5'-gatgaaaaagtgactgccatgctcttcgatggc-cgctcaagttagtataaaaaagctgaac-3'        |
| P14           | 5'-ttacaacgcaatatccgccacttcttttgaacggg-tgaagcctgctttttataactaagttgg-3'      |
| P15           | 5'-gctgccgtcaggtcaatatg-3'                                                  |
| P16           | 5'-cgcggtagttcgctaaactgc-3'                                                 |
| P17           | 5'-taacgcaacaatcctcggccagccatcgctttgtcctgtt-cgctcaagttagtataaaaaagctgaac-3' |
| P18           | 5'-caagacgtctgaaggcgctcaagacgaccgctacgctgcc-tgaagcctgctttttataactaagttgg-3' |
| P19           | 5'-ctgtcgcgtagtaagcgttgc-3'                                                 |
| P20           | 5'-gcgctgcttgatcagttcgc-3'                                                  |
